# Supplementary material for: Lipid metabolic rewiring in glioma-associated microglia/macrophages (Review)
Source: PubMed Central journal article supplement — Int J Mol Med. 2024 Sep 16;54(5):102. doi: 10.3892/ijmm.2024.5426 (PMC11414527; doi:10.3892/ijmm.2024.5426), 2024-09-16
Supplement: Supplementary_Data.pdf [file Supplementary_Data.pdf]

**Table S1.** Abbreviations.

|                |                                                  |
|----------------|--------------------------------------------------|
| <b>27-HC</b>   | <b>27-Hydroxycholesterol</b>                     |
| AA             | Arachidonic Acid                                 |
| ABC            | ATP-Binding Cassette                             |
| ABHD5          | Alpha/Beta Hydrolase Domain Containing 5         |
| Akt            | Protein Kinase B                                 |
| ApoA1          | Apolipoprotein A1                                |
| ATGL           | Adipose Triglyceride Lipase                      |
| ATP            | Adenosine Triphosphate                           |
| BMDM           | Bone Marrow-Derived Monocytes                    |
| BRM            | Brain-Resident Microglia                         |
| CB2            | Cannabinoid Receptor 2                           |
| CCL2           | Chemokine (C-C Motif) Ligand 2                   |
| CNS            | Central Nervous System                           |
| COX            | Cyclooxygenase                                   |
| CX3CL1         | Chemokine (C-X3-C Motif) Ligand 1                |
| CXCL12         | C-X-C Motif Chemokine Ligand 12                  |
| CYP450         | Cytochrome P450                                  |
| DGAT           | Diacylglycerol O-Acyltransferase                 |
| DHA            | Docosahexaenoic Acid                             |
| EAE            | Experimental Allergic Encephalomyelitis          |
| E-FABP         | Epidermal Fatty Acid-Binding Protein             |
| EPA            | Eicosapentaenoic Acid                            |
| ERK1/2         | Extracellular Signal-Regulated Kinases 1 and 2   |
| FA             | Fatty Acid                                       |
| FAO            | Fatty Acid Oxidation                             |
| FFA            | Free Fatty Acid                                  |
| FFAR3          | Free Fatty Acid Receptor 3                       |
| GAM            | Glioma-Associated Microglia/Macrophages          |
| GBM            | Glioblastoma Multiforme                          |
| GM-CSF         | Granulocyte-Macrophage Colony-Stimulating Factor |
| Gpnmb          | Glycoprotein Non-Metastatic Melanoma Protein B   |
| GPR41          | G Protein-Coupled Receptor 41                    |
| HDAC           | Histone Deacetylase                              |
| HETE           | Hydroxyeicosatetraenoic Acid                     |
| HIF-1 $\alpha$ | Hypoxia-Inducible Factor 1 Alpha                 |
| HSL            | Hormone-Sensitive Lipase                         |
| IFN- $\gamma$  | Interferon Gamma                                 |
| LOX            | Lipoxygenase                                     |
| LPS            | Lipopolysaccharide                               |
| LT             | Leukotriene                                      |
| MAPK           | Mitogen-Activated Protein Kinase                 |
| MCAD           | Medium-Chain Acyl-CoA Dehydrogenase              |
| MCP-1          | Monocyte Chemoattractant Protein-1               |

|                 |                                                                     |
|-----------------|---------------------------------------------------------------------|
| M-CSF           | Macrophage Colony-Stimulating Factor                                |
| MGAT            | Monoacylglycerol Acyltransferase                                    |
| MGLL            | Monoglyceride Lipase                                                |
| MMP             | Matrix Metalloproteinase                                            |
| mPGES-1         | Microsomal Prostaglandin E Synthase-1                               |
| mTOR            | mammalian Target of Rapamycin                                       |
| NF- $\kappa$ B  | Nuclear Factor-Kappa-Genes Binding                                  |
| OLFML3          | Olfactomedin-Like 3                                                 |
| P2RY12          | Purinergic Receptor P2Y12                                           |
| P4HA1           | Prolyl 4-Hydroxylase Subunit Alpha 1                                |
| PD-1            | Programmed Cell Death Protein 1                                     |
| PDCD10          | Programmed Cell Death 10                                            |
| PG              | Prostaglandin                                                       |
| PGC-1 $\beta$   | Peroxisome Proliferator-Activated Receptor Gamma Coactivator 1 Beta |
| PGE2            | Prostaglandin E2                                                    |
| PI3K            | Phosphoinositide 3-Kinase                                           |
| PPAR            | Peroxisome Proliferator-Activated Receptor                          |
| PUFA            | Polyunsaturated Fatty Acid                                          |
| RIPK3           | Receptor-Interacting Protein Kinase 3                               |
| RNA             | Ribonucleic Acid                                                    |
| ROS             | Reactive Oxygen Species                                             |
| SARM            | Sterile Alpha and Armadillo Motif                                   |
| SCFA            | Short-Chain Fatty Acid                                              |
| SIRT4           | Sirtuin 4                                                           |
| Spp1            | Secreted Phosphoprotein 1 (Osteopontin)                             |
| SRM             | Spermine Synthase                                                   |
| STAT6           | Signal Transducer and Activator of Transcription 6                  |
| TAM             | Tumor-Associated Macrophages                                        |
| TCA             | Tricarboxylic Acid                                                  |
| TGF- $\beta$ II | Transforming Growth Factor Beta II                                  |
| TLR4            | Toll-Like Receptor 4                                                |
| TME             | Tumor Microenvironment                                              |
| TMEM119         | Transmembrane Protein 119                                           |
| TNF             | Tumor Necrosis Factor                                               |
| Treg            | Regulatory T Cell                                                   |
| WHO             | World Health Organization                                           |
| YVAD            | A caspase-1 inhibitor (Tyr-Val-Ala-Asp)                             |
